# Supplementary material
Source: PubMed Central journal article supplement (PMC3446790)
Supplement: NIHMS218618-supplement-01.pdf [file NIHMS218618-supplement-01.pdf]

Supplemental Table 1. Primers for real-time PCR

| Gene             | Forward primer         | Reverse primer       |
|------------------|------------------------|----------------------|
| $\beta$ -actin   | TTCTACAATGAGCTGCGTGTG  | GGGGTGTGGAAGGTCTCAAA |
| LPA <sub>1</sub> | GTCTTCTGGGCCATTTTCAA   | TCATAGTCCTCTGGCGAACA |
| LPA <sub>2</sub> | CCAGCCTGCTTGTCTTCCTA   | GTGTCCAGCACACCACAAAT |
| LPA <sub>3</sub> | GAATTGCCTCTGCAACATCTC  | ATGAAGAAGGCCAGGAGGTT |
| LPA <sub>4</sub> | TCTGGATCCTAGTCCTCAGTGG | CCAGACACGTTTGGAGAAGC |
| LPA <sub>5</sub> | CGCCATCTTCCAGATGAAC    | TAGCGGTCCACGTTGATG   |
| GPR87            | ACAAATCCAGCAGGCAATTC   | TACGGGAGGAAGCAGGTAAA |
| P2Y5             | TCTGGCAATTGTCTACCCATT  | TCAAAGCAGGCTTCTGAGG  |
| P2Y10            | TCAACATGTATGCCAGCATTT  | GAAATGGCAAACAGGCAGTC |
| S1P1             | GCTGGGTCATCTCCCTCAT    | GCAGTTCAGCCCATGAT    |
| S1P2             | TGGGTGTTTTTCATCATCTGC  | TGGGCTTTGTAGAGGACAGG |
| S1P3             | GGTTTTGATTGCCATCTGGA   | CCAGCAGGTCGCAGAGAG   |
| S1P4             | CTGGGCTGGAAGTGTGTGT    | GACCACCACACAAAAGAGCA |
| S1P5             | GGTGAGCGAGGTCATCGT     | CCAGGAGCAGGAACATGG   |
